# Supplementary material for: High-risk follicular lymphomas harbour more somatic mutations including those in the AID-motif
Source: PubMed Central journal article supplement (PMC5656578; doi:10.1038/s41598-017-14150-0), 2017-10-25
Supplement: 41598_2017_14150_MOESM1_ESM.pdf [file 41598_2017_14150_MOESM1_ESM.pdf]

# **High-risk follicular lymphomas harbour more somatic mutations including those in the AID-motif**

Taku Tsukamoto<sup>1,\*</sup>, Masakazu Nakano<sup>2,\*</sup>, Ryuichi Sato<sup>2</sup>, Hiroko Adachi<sup>2</sup>, Miki Kiyota<sup>1,3</sup>, Eri Kawata<sup>4</sup>, Nobuhiko Uoshima<sup>4</sup>, Satoru Yasukawa<sup>5</sup>, Yoshiaki Chinen<sup>1</sup>, Shinsuke Mizutani<sup>1</sup>, Yuji Shimura<sup>1</sup>, Tsutomu Kobayashi<sup>1</sup>, Shigeo Horiike<sup>1</sup>, Akio Yanagisawa<sup>5</sup>, Masafumi Taniwaki<sup>1</sup>, Kei Tashiro<sup>2</sup>, Junya Kuroda<sup>1</sup>

1. Division of Hematology and Oncology, Department of Medicine, Kyoto Prefectural University of Medicine, Kyoto,

Japan

2. Department of Genomic Medical Sciences, Kyoto Prefectural University of Medicine, Kyoto, Japan

3. Department of Hematology, Matsushita Memorial Hospital, Osaka, Japan

4. Department of Hematology, Japanese Red Cross Kyoto Daini Hospital, Kyoto, Japan

5. Department of Surgical Pathology, Kyoto Prefectural University of Medicine, Kyoto, Japan

\* These authors contributed equally to this work.

## Supplementary methods

### *Patients and diagnostic procedures*

We retrospectively analyzed 103 patients in the discovery cohort and 68 patients in the validation cohort. The Groupe pour l'Etude de Lymphome Folliculaire (GELF) criteria were basically utilized for the determination of whether to initiate systemic immunochemotherapy <sup>1</sup>. Extranodal involvements, except bone marrow (BM) and peripheral blood (PB), were examined by a computed tomography (CT) scan and/or 2-deoxy-2-[fluorine-18]fluoro-D-glucose integrated with CT (<sup>18</sup>F-FDG PET/CT) based on the recommendations of the 11th International Conference on Malignant Lymphoma <sup>2</sup>. Involvements of the BM and PB were assessed cytologically by counting 500 and 100 cells under a light microscope, respectively, and BM was also assessed by histologic examination. The criteria of the conventional prognostic indexes, i.e., Follicular Lymphoma International Prognostic Index (FLIPI) and follicular lymphoma international prognostic index-2 (FLIPI2), and the definition of treatment response and disease progression were described previously <sup>3-6</sup>. The patients' clinical data were obtained from their medical records.

### *Chromosomal analysis*

Giemsa-banding was performed on metaphase spreads of biopsied specimens, and the karyotype was described in accordance with the International System for Human Cytogenetic Nomenclature (ISCN) (2013) <sup>7</sup>. Double color fluorescence *in situ* hybridization (FISH) was occasionally used for the detection of chromosomal translocation t(14;18)(q32;q21) for the *IGH/BCL2* fusion gene, in cases where the metaphase spread was unavailable <sup>8</sup>.

### *Sample collection and DNA extraction*

Genomic DNA (gDNA) was extracted from tumor specimens and from matched normal peripheral blood mononuclear cells (PBMCs) using the AllPrep DNA/RNA/Protein Mini Kit (QIAGEN, Valencia, CA, USA), and the QIAamp DNA Blood Mini Kit (QIAGEN), respectively. The concentration, purity, and size of the extracted gDNA were checked using a NanoDrop 2000 spectrophotometer (Thermo Scientific, Waltham, MA, USA), Qubit 2.0 fluorometer (Thermo Fisher Scientific), and agarose gel electrophoresis.

### *Library preparation and whole exome sequencing (WES)*

Next generation sequencing (NGS) libraries were prepared from the extracted gDNA using a SureSelect XT Target Enrichment System Kit (Agilent Technologies, Santa Clara, CA, USA) for Illumina Multiplexed Sequencing. In brief, 3.0 µg of gDNA *per* sample was fragmented into 150-200 base pairs (bps) using a Covaris S220 sonicator (Covaris, Woburn, MA, USA), and the size distribution of the products was precisely validated with a Bioanalyzer DNA 1000 (Agilent Technologies). The fragmented DNA was then end-repaired, adenylated at the 3' end, and ligated with paired-end sequencing adaptors. After amplification by the polymerase chain reaction (PCR) and removal of the unligated adaptors using Agencourt AMPure XP beads (Beckman Coulter, Tokyo, Japan), the generated libraries were assessed for their qualities and quantities using the Bioanalyzer DNA 1000. Seven hundred and fifty ng of each library was hybridized in solution with the biotinylated probes derived from the SureSelectXT Human All Exon v5 Capture Library Kit (Agilent Technologies) for 20 hours at 65°C. The hybridized fraction in the mixture was isolated by streptavidin magnetic beads, followed by a 21-cycle of PCR amplification. Each enriched library was then qualified and quantified by both the

Bioanalyzer High sensitivity assay (Agilent Technologies) and quantitative PCR using the KAPA NGS qPCR kit (Kapa Biosystems, Wilmington, MA). Finally, the sequencing was performed in the NGS Core Facility at Kyoto Prefectural University of Medicine with the HiScanSQ (Illumina, San Diego, CA, USA) in the NGS Sequencing Core in the facility using the 100-bp paired-end method for 2 runs. Pooled tumor and germline NGS libraries were loaded onto 6 lanes and 2 lanes of the flowcell for each run, respectively.

#### *Detection of single nucleotide variants (SNVs), insertions and deletions (InDels) with the WES data*

NGS raw data were converted into FASTQ files using CASAVA software (version 1.8.2), and each data set was aligned to the human genome reference (UCSC hg19) using the Burrows-Wheeler Aligner (BWA) (version 0.7.12) <sup>9</sup>. For quality control, we removed the low quality reads if: 1) over 80% of the sequences consisted of the bases below a quality score of 20 and 2) lengths were shorter than 30 bps. In addition, 3' end bases below a quality score of 20 were trimmed using PRINSEQ (version 0.20.4) and FASTX (version 0.0.13) <sup>10</sup>. Filtered and quality-controlled sequence set was aligned to the human genome reference (UCSC hg19) using the Burrows-Wheeler Aligner (BWA) (version 0.7.12) <sup>9</sup>. In order to summarize the basic quality of the sequencing data, we calculated the average depth of coverage as “total number of reads mapped to the reference/total number of target regions”, the coverage rate of target regions as “number of bases covered over 10 reads/total bases of the targets” and the on-target rate as “total number of reads mapped to the targets/total number of reads mapped to the reference”. SnpEff (version 4.0) was used to annotate SNVs and InDels <sup>11</sup>. PolyPhen-2 and SIFT were utilized to evaluate the possible impacts of the variants on the protein <sup>12,13</sup>. To investigate the functional relationships among the mutated genes, both a gene set enrichment analysis using a hypergeometric test (BiNGO) (version 3.0.3) and

pathway analysis were performed by comparing the pathway data derived from the Kyoto Encyclopedia of Genes and Genomes (KEGG) using Benjamini-Hochberg false discovery rate (FDR) correction <sup>14</sup>. MutSigCV (version 1.4) was used to identify driver mutation genes <sup>15</sup>.

### Supplementary References

- 1 Brice, P. *et al.* Comparison in low-tumor-burden follicular lymphomas between an initial no-treatment policy, prednimustine, or interferon alfa: a randomized study from the Groupe d'Etude des Lymphomes Folliculaires. Groupe d'Etude des Lymphomes de l'Adulte. *J Clin Oncol* **15**, 1110-1117 (1997).
- 2 Cheson, B. D. *et al.* Recommendations for initial evaluation, staging, and response assessment of Hodgkin and non-Hodgkin lymphoma: the Lugano classification. *J Clin Oncol* **32**, 3059-3068, doi:10.1200/JCO.2013.54.8800 (2014).
- 3 Solal-Celigny, P. *et al.* Follicular lymphoma international prognostic index. *Blood* **104**, 1258-1265, doi:10.1182/blood-2003-12-4434 (2004).
- 4 Federico, M. *et al.* Follicular lymphoma international prognostic index 2: a new prognostic index for follicular lymphoma developed by the international follicular lymphoma prognostic factor project. *J Clin Oncol* **27**, 4555-4562, doi:10.1200/JCO.2008.21.3991 (2009).
- 5 Cheson, B. D. *et al.* Report of an international workshop to standardize response criteria for non-Hodgkin's lymphomas. NCI Sponsored International Working Group. *J Clin Oncol* **17**, 1244 (1999).
- 6 Cheson, B. D. *et al.* Revised response criteria for malignant lymphoma. *J Clin Oncol* **25**, 579-586, doi:10.1200/JCO.2006.09.2403 (2007).
- 7 Shaffer, L., McGowan-Jordan, J. & Schmid, M. An International System for Human Cytogenetic Nomenclature, (S Karger, Basel 2013). *ISCN (2013)* (2013).
- 8 Takimoto, T. *et al.* Extranodal marginal zone lymphoma of uterine cervix with concomitant copy number gains of the MALT1 and BCL2 genes. *Oncol Lett* **in press**.
- 9 Li, H. & Durbin, R. Fast and accurate short read alignment with Burrows-Wheeler transform. *Bioinformatics* **25**, 1754-1760, doi:10.1093/bioinformatics/btp324 (2009).
- 10 Schmieder, R. & Edwards, R. Quality control and preprocessing of metagenomic datasets. *Bioinformatics* **27**, 863-864, doi:10.1093/bioinformatics/btr026 (2011).
- 11 Cingolani, P. *et al.* A program for annotating and predicting the effects of single nucleotide polymorphisms, SnpEff: SNPs in the genome of *Drosophila melanogaster* strain w1118: iso-2; iso-3. *Fly (Austin)* **6**, 80-92, doi:10.4161/fly.19695 (2012).
- 12 Ng, P. C. SIFT: predicting amino acid changes that affect protein function. *Nucleic Acids Research*

- 31**, 3812-3814, doi:10.1093/nar/gkg509 (2003).
- 13 Adzhubei, I. A. *et al.* A method and server for predicting damaging missense mutations. *Nat Methods* **7**, 248-249, doi:10.1038/nmeth0410-248 (2010).
- 14 Maere, S., Heymans, K. & Kuiper, M. BiNGO: a Cytoscape plugin to assess overrepresentation of gene ontology categories in biological networks. *Bioinformatics* **21**, 3448-3449, doi:10.1093/bioinformatics/bti551 (2005).
- 15 Lawrence, M. S. *et al.* Mutational heterogeneity in cancer and the search for new cancer-associated genes. *Nature* **499**, 214-218, doi:10.1038/nature12213 (2013).

## Supplementary Figure S1

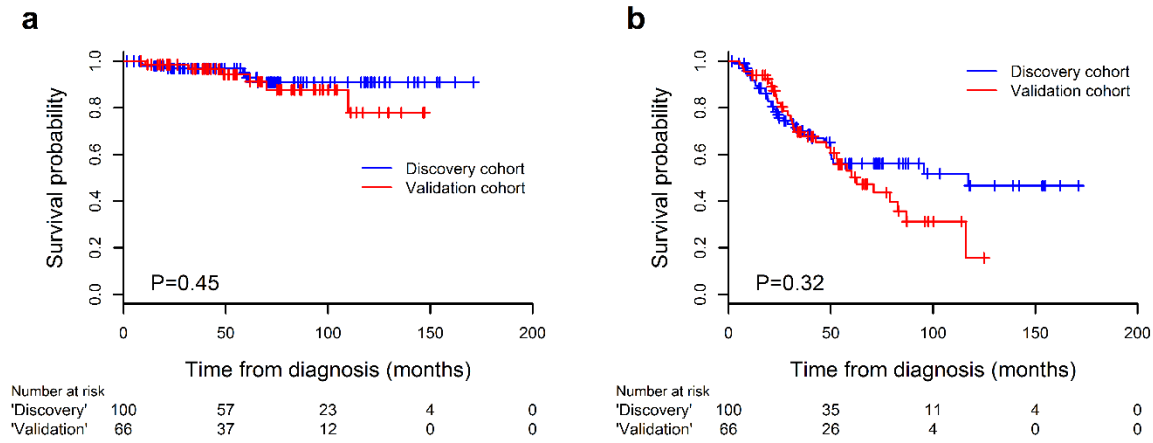

### Supplementary Figure S1.

#### Overall survival and progression-free survival.

Overall survival (OS) (a) and progression-free survival (PFS) (b) of entire cohort. Five-year OS and PFS in the discovery cohort were 94.9% and 56.1%, respectively, and 94.3% and 53.0% in the validation cohort.

## Supplementary Figure S2

**a**

| H1               | H2               | H3               | H4              | H5              |
|------------------|------------------|------------------|-----------------|-----------------|
| <i>PANK4</i>     | <i>LAPTM5</i>    | <i>TNFRSF14</i>  | <i>FUBP1</i>    | <i>FUBP1</i>    |
| <i>TNFRSF14</i>  | <i>LRRC41</i>    | <i>SFN</i>       | <i>PPIAL4G</i>  | <i>KIF21B</i>   |
| <i>HIVEP3</i>    | <i>GBP4</i>      | <i>GJB4</i>      | <i>CTSS</i>     | <i>TAF1A</i>    |
| <i>ENSA</i>      | <i>HRNR</i>      | <i>IGSF9</i>     | <i>LGR6</i>     | <i>LYST</i>     |
| <i>POGZ</i>      | <i>KPRP</i>      | <i>SRGAP2</i>    | <i>DHX15</i>    | <i>OR2L8</i>    |
| <i>RABGAP1L</i>  | <i>OR6K2</i>     | <i>ANTXR1</i>    | <i>FDCSP</i>    | <i>CCDC138</i>  |
| <i>IRF2BP2</i>   | <i>DDR2</i>      | <i>NCKAP1</i>    | <i>PTPN13</i>   | <i>DAPL1</i>    |
| <i>RYR2</i>      | <i>DNAH14</i>    | <i>NAT6</i>      | <i>PCDH10</i>   | <i>PLCD4</i>    |
| <i>FMNL2</i>     | <i>DISC1</i>     | <i>DOCK3</i>     | <i>HMGB2</i>    | <i>ATP13A4</i>  |
| <i>TGFBR2</i>    | <i>HNRNPU</i>    | <i>DNAH12</i>    | <i>LSM11</i>    | <i>ADAMTS3</i>  |
| <i>MSL2</i>      | <i>NDUFAF7</i>   | <i>KLHL6</i>     | <i>DOCK2</i>    | <i>RASSF6</i>   |
| <i>ZBBX</i>      | <i>TRAF3IP1</i>  | <i>RFC4</i>      | <i>HIST1H1C</i> | <i>BMP2K</i>    |
| <i>ATP13A4</i>   | <i>CCDC13</i>    | <i>HTT</i>       | <i>ICA1</i>     | <i>AGPAT9</i>   |
| <i>GPR125</i>    | <i>STXBP5L</i>   | <i>SLC30A9</i>   | <i>AASS</i>     | <i>PIK3R1</i>   |
| <i>FGB</i>       | <i>SI</i>        | <i>PPEF2</i>     | <i>SARAF</i>    | <i>POLK</i>     |
| <i>NIM1K</i>     | <i>KLHL6</i>     | <i>TENM3</i>     | <i>NOV</i>      | <i>RASA1</i>    |
| <i>MAML1</i>     | <i>CLCN2</i>     | <i>MAP1B</i>     | <i>RAD23B</i>   | <i>ZNF608</i>   |
| <i>EEF1A1</i>    | <i>ANK2</i>      | <i>STK32A</i>    | <i>LMX1B</i>    | <i>FAM13B</i>   |
| <i>CYP3A7</i>    | <i>JADE1</i>     | <i>FAT2</i>      | <i>CHAT</i>     | <i>PCDHA2</i>   |
| <i>LAMB1</i>     | <i>SPEF2</i>     | <i>TNXB</i>      | <i>PPP2R2D</i>  | <i>ARAP3</i>    |
| <i>CNTNAP2</i>   | <i>MROH2B</i>    | <i>PTCRA</i>     | <i>NUP98</i>    | <i>EPHA7</i>    |
| <i>TNFRSF10A</i> | <i>SRA1</i>      | <i>COL12A1</i>   | <i>PGR</i>      | <i>SOBP</i>     |
| <i>EPPK1</i>     | <i>PCDHA9</i>    | <i>TXLNB</i>     | <i>ZNF202</i>   | <i>C6orf211</i> |
| <i>PLEC</i>      | <i>CDHR2</i>     | <i>CARD11</i>    | <i>ETS1</i>     | <i>PCLO</i>     |
| <i>POMT1</i>     | <i>VARS</i>      | <i>MIOS</i>      | <i>ANO4</i>     | <i>CUX1</i>     |
| <i>AKR1C2</i>    | <i>PIM1</i>      | <i>ZNF735P</i>   | <i>SPRY2</i>    | <i>MYOM2</i>    |
| <i>PHRF1</i>     | <i>FAM83B</i>    | <i>LRRN3</i>     | <i>BMP4</i>     | <i>HMCN2</i>    |
| <i>COLCA2</i>    | <i>MYO6</i>      | <i>EZH2</i>      | <i>CREBBP</i>   | <i>NSMF</i>     |
| <i>TULP3</i>     | <i>TPD52L1</i>   | <i>FAM167A</i>   | <i>NDRG4</i>    | <i>PARD3</i>    |
| <i>PIK3C2G</i>   | <i>VIP</i>       | <i>MTUS1</i>     | <i>CA5A</i>     | <i>CDH23</i>    |
| <i>KMT2D</i>     | <i>SPATA31D1</i> | <i>CSMD3</i>     | <i>TP53</i>     | <i>KCNMA1</i>   |
| <i>PPFIA2</i>    | <i>SVIL</i>      | <i>ASAP1</i>     | <i>MYO15A</i>   | <i>PLCE1</i>    |
| <i>MGAT4C</i>    | <i>ZNF438</i>    | <i>FREM1</i>     | <i>CDH2</i>     | <i>OR52N2</i>   |
| <i>TMEM119</i>   | <i>GDF2</i>      | <i>CORO2A</i>    | <i>DSC1</i>     | <i>OR2AT4</i>   |
| <i>RNF219</i>    | <i>RUFY2</i>     | <i>SIRT1</i>     | <i>BCL2</i>     | <i>HDAC7</i>    |
| <i>MDGA2</i>     | <i>CDH23</i>     | <i>MUC5B</i>     | <i>MEF2B</i>    | <i>KMT2D</i>    |
| <i>CREBBP</i>    | <i>DNMBP</i>     | <i>ZNF408</i>    | <i>EXOC3L2</i>  | <i>ALKBH1</i>   |
| <i>OR1A2</i>     | <i>OR5D16</i>    | <i>PCF11</i>     | <i>BPI</i>      | <i>THSD4</i>    |
| <i>HEATR6</i>    | <i>GPR137</i>    | <i>MMP3</i>      | <i>IGLL5</i>    | <i>CLEC18C</i>  |
| <i>CD79B</i>     | <i>NAALAD2</i>   | <i>OR8B2</i>     | <i>MYO18B</i>   | <i>SALL3</i>    |
| <i>CD79A</i>     | <i>PIWIL4</i>    | <i>KIAA1033</i>  | <i>ATF4</i>     | <i>TMPRSS9</i>  |
| <i>LMTK3</i>     | <i>POU2AF1</i>   | <i>SPTB</i>      | <i>ATP6AP1</i>  | <i>NOTCH3</i>   |
| <i>PRRG2</i>     | <i>GRIN2B</i>    | <i>SERPINA2</i>  |                 | <i>TRPM2</i>    |
| <i>KRTAP10-4</i> | <i>MAP3K12</i>   | <i>OCA2</i>      |                 | <i>EP300</i>    |
| <i>PLA2G6</i>    | <i>NCKAP1L</i>   | <i>DAPK2</i>     |                 | <i>DCAF12L2</i> |
| <i>CHDC2</i>     | <i>ASCL1</i>     | <i>CREBBP</i>    |                 | <i>MAGEC3</i>   |
| <i>CDR1</i>      | <i>CIDEB</i>     | <i>ERAL1</i>     |                 |                 |
|                  | <i>GSG1L</i>     | <i>MYO1D</i>     |                 |                 |
|                  | <i>MBTPS1</i>    | <i>C17orf104</i> |                 |                 |
|                  | <i>DNAH2</i>     | <i>GNA13</i>     |                 |                 |
|                  | <i>KRTAP4-7</i>  | <i>TBCD</i>      |                 |                 |
|                  | <i>ZNF521</i>    | <i>CNTD2</i>     |                 |                 |
|                  | <i>DTNA</i>      | <i>SYNGR4</i>    |                 |                 |
|                  | <i>MBD1</i>      | <i>CHD6</i>      |                 |                 |
|                  | <i>BCL2</i>      | <i>GRIK1</i>     |                 |                 |
|                  | <i>CYP4F22</i>   | <i>IGSF5</i>     |                 |                 |
|                  | <i>MEF2B</i>     | <i>SUSD2</i>     |                 |                 |
|                  | <i>ZNF575</i>    | <i>KIAA1671</i>  |                 |                 |
|                  | <i>USP29</i>     | <i>TLR8</i>      |                 |                 |
|                  | <i>IGLL5</i>     | <i>FANCB</i>     |                 |                 |
|                  | <i>BCR</i>       | <i>MAGEB10</i>   |                 |                 |
|                  | <i>ARSD</i>      | <i>TBC1D8B</i>   |                 |                 |
|                  | <i>DMD</i>       | <i>RGAG1</i>     |                 |                 |
|                  | <i>ATP7A</i>     | <i>SMARCA1</i>   |                 |                 |
|                  | <i>DRP2</i>      | <i>NSDHL</i>     |                 |                 |

## Supplementary Figure S2.

### List of non-synonymous variants.

Non-synonymous variants of the high- (a) and standard-risk (b) FLs. Blue letters indicate missense mutations, mostly due to single nucleotide variations. Green, nonsense mutations; purple, frame-shift; orange, splice site mutations; red, multiple mutations.





### Supplementary Figure S3

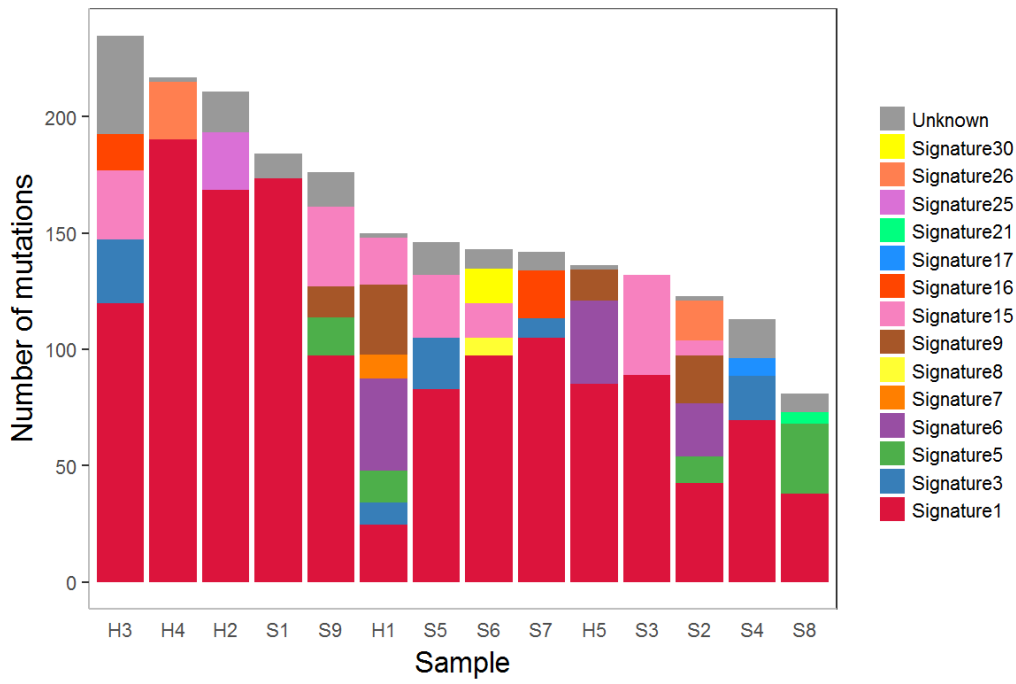

### Supplementary Figure S3.

#### Mutational signatures of 14 FLs.

The number of mutations of each signature according to COSMIC database.

## Supplementary Figure S4

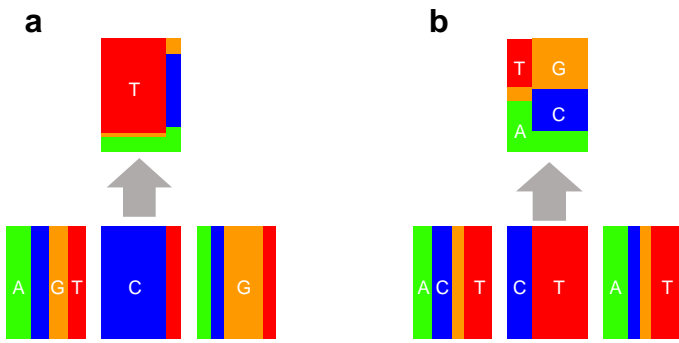

### Supplementary Figure S4.

#### Mutational signatures of COSMIC database.

The profile of signature 1 (a) and signature 9 (b) according to COSMIC database is reconstructed into simplified logo in order to compare Figure 4a.

## Supplementary Figure S5

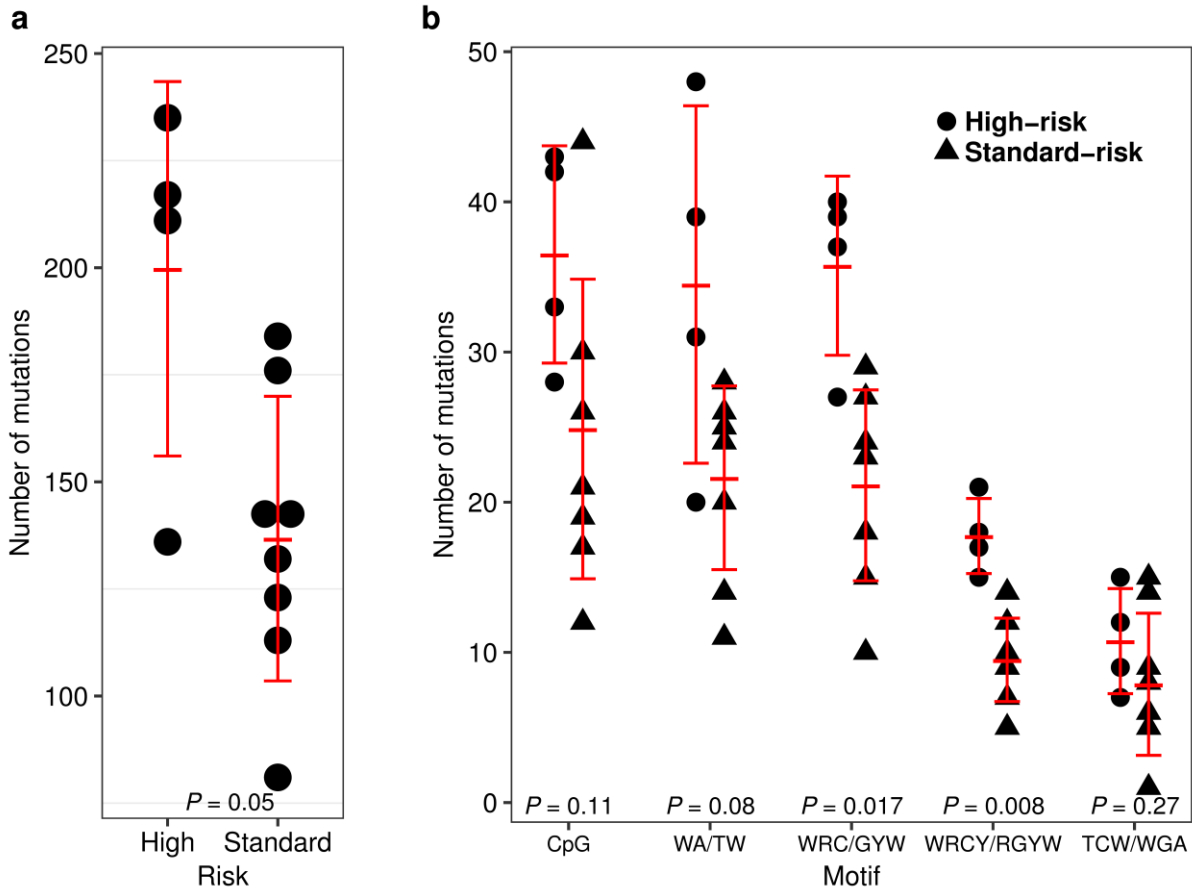

### Supplementary Figure S5.

#### Comparison of mutational load excluding t(14;18)-negative patients.

The numbers of all somatic mutations (a) and mutations in CpG, WA, WRC, WRCY and TCW motifs (b) are indicated. Patients without t(14;18) are excluded.

**Supplementary Table S1. Clinical characteristics of non-transformed follicular lymphoma (FL) patients**

| Characteristics                          | Discovery cohort<br>(n=100) | Validation cohort<br>(n=66) | <i>P</i> |
|------------------------------------------|-----------------------------|-----------------------------|----------|
| Follow-up period, months, median (range) | 61 (3-173)                  | 55 (8-147)                  | 0.74 *   |
| Age at diagnosis, years, median (range)  | 61 (38-88)                  | 63 (41-86)                  | 0.11 *   |
| Gender, male : female                    | 42 : 58                     | 29 : 37                     | 0.87 †   |
| Ann Arbor stage: 3-4                     | 66 (66%)                    | 46 (70%)                    | 0.61 †   |
| B symptom                                | 10 (14%)                    | 6 (13%)                     | 1 †      |
| Histologic grade                         |                             |                             |          |
| 1-2                                      | 75 (82%)                    | 35 (59%)                    | <0.001 † |
| 3a                                       | 10 (18%)                    | 24 (41%)                    |          |
| BM involvement                           | 31 (31%)                    | 24 (36%)                    | 0.50 †   |
| Max diameter: ≥6cm                       | 12 (12%)                    | 6 (9%)                      | 1 †      |
| No. of nodal sites: ≥5                   | 31 (32%)                    | 25 (46%)                    | 0.11 †   |
| No. of extranodal sites                  |                             |                             |          |
| 1                                        | 34 (34%)                    | 29 (45%)                    | 0.42 †   |
| ≥2                                       | 13 (13%)                    | 8 (12%)                     |          |
| Karyotype                                |                             |                             |          |
| t(14;18)(q32;q21)                        | 65 (88%)                    | 19 (76%)                    | 0.18 †   |
| Normal                                   | 3 (4%)                      | 1 (4%)                      |          |
| Others                                   | 6 (8%)                      | 5 (20%)                     |          |
| FLIPI                                    |                             |                             |          |
| Low                                      | 41 (42%)                    | 19 (32%)                    | 0.21 †   |
| Intermediate                             | 27 (28%)                    | 15 (25%)                    |          |
| High                                     | 29 (30%)                    | 26 (43%)                    |          |
| FLIPI2                                   |                             |                             |          |
| Low                                      | 8 (16%)                     | 8 (22%)                     | 0.72 †   |
| Intermediate                             | 32 (63%)                    | 20 (56%)                    |          |
| High                                     | 11 (22%)                    | 8 (22%)                     |          |

BM, bone marrow; FLIPI, follicular lymphoma international prognostic index; FLIPI2, follicular lymphoma international prognostic index-2; \*, t-test; †, Fisher's exact test.

**Supplementary Table S2. First line treatment of 103 patients in the discovery cohort**

|                                                           |               |          |
|-----------------------------------------------------------|---------------|----------|
| Treatment                                                 | n=100         |          |
| R-CHOP/THP-COP                                            | 68 (68%)      |          |
| R-monotherapy                                             | 9 (9%)        |          |
| Other immunochemotherapies (R-bendamustine, R-cladribine) | 7 (7%)        |          |
| Watch and wait                                            | 16 (16%)      |          |
| Additional treatment                                      | R maintenance | 17 (17%) |
|                                                           | Radiation     | 1 (1%)   |

R, rituximab.

**Supplementary Table S3. Statistical analyses for extranodal involvement sites associated with disease risk in the discovery cohort**

| Extranodal site       | Patients, N (%) | Univariate analysis |          | Multivariate analysis |          |
|-----------------------|-----------------|---------------------|----------|-----------------------|----------|
|                       |                 | HR (95% CI)         | <i>P</i> | HR (95% CI)           | <i>P</i> |
| BM                    | 30 (30%)        | 1.28(0.65-2.53)     | 0.48     |                       |          |
| PB                    | 7 (7%)          | 4.20(1.44-12.24)    | 0.009    | 3.91(1.487-10.28)     | 0.006    |
| Bone                  | 6 (6%)          | 3.42(1.32-8.88)     | 0.012    | 4.90(1.65-14.5)       | 0.004    |
| Liver                 | 3 (3%)          | 3.30(0.79-13.82)    | 0.10     |                       |          |
| Lung                  | 1 (1%)          | 23.33(2.61-208.8)   | 0.005    |                       |          |
| Soft tissue           | 4 (4%)          | 2.31(0.55-9.66)     | 0.25     |                       |          |
| Pleura                | 1 (1%)          | 2.73(0.37-20.27)    | 0.33     |                       |          |
| Duodenum              | 7 (7%)          | 0.28(0.039-2.06)    | 0.21     |                       |          |
| GI excluding duodenum | 6 (6%)          | 0.71(0.17-2.94)     | 0.63     |                       |          |

Univariate (left column) and multivariate (right column) analyses of extranodal involvement sites in progression-free survival. Multivariate analysis was adjusted for high risk of FLIPI. HR, hazard ratio; CI, confidence interval; N, number; BM, bone marrow; PB, peripheral blood; GI, gastrointestinal.

**Supplementary Table S4. Clinical characteristics of the high- and standard-risk patients**

| Characteristics            | Discovery cohort |               |          | Validation cohort |               |          |
|----------------------------|------------------|---------------|----------|-------------------|---------------|----------|
|                            | High-risk        | Standard-risk | <i>P</i> | High-risk         | Standard-risk | <i>P</i> |
| No. of patients            | 13               | 87            |          | 11                | 55            |          |
| Age, years, median (range) | 67 (40-81)       | 60 (38-88)    | 0.61 *   | 62 (50-86)        | 64 (41-85)    | 0.86 *   |
| Gender, male : female      | 4 : 9            | 38 : 49       | 0.55 †   | 4 : 7             | 25 : 30       | 0.74 †   |
| Histologic grade           |                  |               |          |                   |               |          |
| 1-2                        | 10 (77%)         | 65 (89%)      | 0.36 †   | 7 (70%)           | 28(55%)       | 0.50 †   |
| 3a                         | 3 (23%)          | 8 (11%)       |          | 3 (30%)           | 23 (45%)      |          |
| Ann Arbor stage : 3-4      | 13 (100%)        | 53 (61%)      | 0.04 †   | 11 (100%)         | 35 (64%)      | 0.03 †   |
| No. of nodal sites: ≥5     | 8 (62%)          | 23 (27%)      | 0.02 †   | 4 (67%)           | 21 (44%)      | 0.40 †   |
| Bulky mass                 | 0 (0%)           | 6 (11%)       | 0.59 †   | 0 (0%)            | 6 (14%)       | 1 †      |
| FLIPI                      |                  |               |          |                   |               |          |
| Low                        | 1 (8%)           | 40 (48%)      | 0.01 †   | 3 (38%)           | 16 (31%)      | 0.79 †   |
| Intermediate               | 5 (38%)          | 22 (26%)      |          | 1 (13%)           | 14 (27%)      |          |
| High                       | 7 (54%)          | 22 (26%)      |          | 4 (50%)           | 22 (42%)      |          |
| PFS, months, median        | 27.2             | NA            | <0.001 ‡ | 57.7              | 71.0          | 0.04 ‡   |

FLIPI, FL International Prognostic Index; PFS, progression-free survival; NA, not applicable; \*, t-test; †, Fisher's exact test; ‡, log-rank test.



**Supplementary Table S5. Clinical characteristics of 14 FLs subjected to whole exome sequencing (WES).**

| Age                  | Gender | Histologic grade | CS  | Extranodal sites | No. of nodal sites | Bulky mass | FLIPI/FLIPI2 | karyotype |                                                                                                                                                                                                        |
|----------------------|--------|------------------|-----|------------------|--------------------|------------|--------------|-----------|--------------------------------------------------------------------------------------------------------------------------------------------------------------------------------------------------------|
| <b>High-risk</b>     |        |                  |     |                  |                    |            |              |           |                                                                                                                                                                                                        |
| 1                    | 47     | M                | 1   | 4A               | BM, PB             | 10         | No           | Int/Int   | 46, XY, t(14;18)(q32;q21) [5]/49, idem, +X, +7, +12 [11]/50, idem, +X, +Y, +12, +der(18)t(14;18) [2]/46, XY [1]                                                                                        |
| 2                    | 75     | F                | 3a  | 4A               | BM, PB             | 7          | No           | High/NA   | 80, XXX, +add(1)(p11), der(1)t(1;9)(p11;q11), +3, -4, -4, +5, i(6)(p10), add(7)(q32)x2, -8, -9, +11, -12, t(14;18)(q32;q21)x2, -15, -16, -16, +19, -20, +21, -22, -22, -22, +r, +16mar [1]/46, XX [17] |
| 3                    | 80     | F                | 2   | 4A               | Bone               | 4          | No           | High/NA   | NA                                                                                                                                                                                                     |
| 4                    | 65     | M                | 2   | 4B               | BM, Bone, Pleura   | 9          | No           | High/High | 46, XY, add(3)(q11.2), add(6)(q21), t(14;18)(q32;q21)[2]/47, XY, +3 [1]/46, XY [14]                                                                                                                    |
| 5                    | 62     | F                | 1   | 4A               | BM, PB             | NA         | No           | Int/High  | 48, XX, +X, +add(5)(p11), t(14;18)(q32;q21) [1]/49, idem, +X [1]/46, XX [3]                                                                                                                            |
| <b>Standard-risk</b> |        |                  |     |                  |                    |            |              |           |                                                                                                                                                                                                        |
| 1                    | 71     | F                | 2   | 4A               | BM                 | 2          | No           | Int/Int   | 48, XX, t(14;18)(q32;q21), +2mar [1]/46, XX [1]                                                                                                                                                        |
| 2                    | 38     | F                | 1   | 3A               | None               | 4          | No           | Low/NA    | 47, XX, +2, add(4)(p11), t(14;18)(q32;q21) [4]/46, XX [5]                                                                                                                                              |
| 3                    | 70     | F                | 2   | 4                | BM                 | NA         | No           | NA/Int    | 46, XX, t(14;18)(q32;q21) [11]/46, XX [9]                                                                                                                                                              |
| 4                    | 51     | F                | 1   | 4A               | BM                 | 1          | No           | Low/NA    | 46, XX, add(3)(q27), add(9)(p11) [1]/48, s1, +8, -10, +2mar [1]                                                                                                                                        |
| 5                    | 51     | F                | 2   | 4A               | BM                 | 2          | No           | Int/NA    | 46, XX                                                                                                                                                                                                 |
| 6                    | 52     | M                | 2   | 3A               | None               | 5          | No           | Int/NA    | 48, XX, t(14;18)(q32;q21), +2mar [1]/46, XX [1]                                                                                                                                                        |
| 7                    | 55     | F                | 2   | 3                | None               | NA         | No           | NA/NA     | No metaphase spreads, FISH( <i>IGH-BCL2</i> ):Positive                                                                                                                                                 |
| 8                    | 80     | M                | 1-2 | 4A               | BM                 | 9          | No           | Int/NA    | No metaphase spreads, FISH( <i>IGH-BCL2</i> ):Positive                                                                                                                                                 |
| 9                    | 71     | F                | 2   | 4B               | BM                 | NA         | No           | High/High | 48, XX, add(8)(p11.2), t(14;18)(q32;q21), ider(18)(q10)t(14;18), +mar1                                                                                                                                 |

CS, clinical stage; FLIPI, follicular lymphoma international prognostic index; FLIPI2, follicular lymphoma international prognostic index-2; M, male; F, female; BM, bone marrow; PB, peripheral blood; NA, not accessed; FISH, fluorescence in situ hybridization.

**Supplementary Table S6. Summary of sequencing data.**

| Case            | Total sequenced reads | Average depth of coverage per region | Coverage rate of target regions (%) | On-target rate (%) |
|-----------------|-----------------------|--------------------------------------|-------------------------------------|--------------------|
| <b>Tumor</b>    |                       |                                      |                                     |                    |
| H-1             | 70435972              | 305.7                                | 98.4                                | 80.9               |
| H-2             | 54638314              | 237.1                                | 98.0                                | 83.3               |
| H-3             | 68870231              | 298.9                                | 98.5                                | 85.3               |
| H-4             | 66780005              | 289.8                                | 98.6                                | 83.6               |
| H-5             | 56591756              | 245.6                                | 98.7                                | 76.8               |
| S-1             | 64005547              | 277.8                                | 98.3                                | 84.7               |
| S-2             | 76946814              | 333.9                                | 98.5                                | 84.7               |
| S-3             | 64302003              | 279.1                                | 98.5                                | 84.9               |
| S-4             | 71535813              | 310.5                                | 98.6                                | 84.9               |
| S-5             | 71058750              | 308.4                                | 99.1                                | 76.7               |
| S-6             | 67187277              | 291.6                                | 99.1                                | 75.4               |
| S-7             | 61786457              | 268.1                                | 98.8                                | 75.2               |
| S-8             | 87646164              | 380.4                                | 99.1                                | 78.2               |
| S-9             | 57607047              | 250                                  | 98.7                                | 76.1               |
| <b>Germline</b> |                       |                                      |                                     |                    |
| H-1             | 23664216              | 102.7                                | 91.1                                | 82.2               |
| H-2             | 26540118              | 115.2                                | 92.9                                | 82.8               |
| H-3             | 22114990              | 96                                   | 90.1                                | 82.3               |
| H-4             | 25798580              | 112                                  | 92.9                                | 85.8               |
| H-5             | 21281753              | 92.4                                 | 91.1                                | 76.5               |
| S-1             | 18627216              | 80.8                                 | 86.4                                | 77.1               |
| S-2             | 23931018              | 103.9                                | 91.3                                | 86.7               |
| S-3             | 23326878              | 101.2                                | 91.5                                | 86.7               |
| S-4             | 25067287              | 108.8                                | 91.7                                | 86.3               |
| S-5             | 29452982              | 98.5                                 | 92.6                                | 77.1               |
| S-6             | 18995500              | 82.4                                 | 88.8                                | 76.2               |
| S-7             | 23325567              | 101.2                                | 91.7                                | 76.2               |
| S-8             | 24232878              | 105.2                                | 92.3                                | 78.1               |
| S-9             | 20408352              | 88.6                                 | 89.7                                | 77.4               |

**Supplementary Table S8. Significantly enriched gene ontologies (GOs) within all non-synonymous mutated genes.**

| GO ID | GO name                                            | <i>P</i> | FDR      |
|-------|----------------------------------------------------|----------|----------|
| 30154 | cell differentiation                               | 9.96E-08 | 2.86E-04 |
| 48869 | cellular developmental process                     | 3.28E-07 | 4.71E-04 |
| 48699 | generation of neurons                              | 6.41E-07 | 6.13E-04 |
| 48468 | cell development                                   | 1.16E-06 | 8.33E-04 |
| 30182 | neuron differentiation                             | 1.96E-06 | 1.12E-03 |
| 32502 | developmental process                              | 2.37E-06 | 1.12E-03 |
| 7399  | nervous system development                         | 2.88E-06 | 1.12E-03 |
| 48666 | neuron development                                 | 3.24E-06 | 1.12E-03 |
| 22008 | neurogenesis                                       | 3.52E-06 | 1.12E-03 |
| 7275  | multicellular organismal development               | 4.86E-06 | 1.24E-03 |
| 32501 | multicellular organismal process                   | 4.98E-06 | 1.24E-03 |
| 7417  | central nervous system development                 | 5.20E-06 | 1.24E-03 |
| 48731 | system development                                 | 6.62E-06 | 1.46E-03 |
| 51153 | regulation of striated muscle cell differentiation | 8.85E-06 | 1.81E-03 |
| 48856 | anatomical structure development                   | 1.07E-05 | 2.05E-03 |
| 48742 | regulation of skeletal muscle fiber development    | 1.58E-05 | 2.83E-03 |
| 31175 | neuron projection development                      | 3.00E-05 | 5.07E-03 |
| 42981 | regulation of apoptosis                            | 3.45E-05 | 5.50E-03 |
| 43067 | regulation of programmed cell death                | 4.34E-05 | 6.40E-03 |
| 45662 | negative regulation of myoblast differentiation    | 4.46E-05 | 6.40E-03 |
| 7156  | homophilic cell adhesion                           | 4.82E-05 | 6.41E-03 |
| 1763  | morphogenesis of a branching structure             | 4.91E-05 | 6.41E-03 |
| 10941 | regulation of cell death                           | 5.28E-05 | 6.58E-03 |
| 23033 | signaling pathway                                  | 6.33E-05 | 7.42E-03 |
| 23052 | signaling                                          | 6.46E-05 | 7.42E-03 |
| 48513 | organ development                                  | 7.38E-05 | 8.15E-03 |
| 48641 | regulation of skeletal muscle tissue development   | 8.10E-05 | 8.58E-03 |
| 16043 | cellular component organization                    | 8.38E-05 | 8.58E-03 |
| 7155  | cell adhesion                                      | 9.78E-05 | 9.63E-03 |
| 22610 | biological adhesion                                | 1.01E-04 | 9.63E-03 |
| 51147 | regulation of muscle cell differentiation          | 1.14E-04 | 1.04E-02 |
| 16337 | cell-cell adhesion                                 | 1.16E-04 | 1.04E-02 |

|       |                                                         |          |          |
|-------|---------------------------------------------------------|----------|----------|
| 18205 | peptidyl-lysine modification                            | 1.26E-04 | 1.10E-02 |
| 60284 | regulation of cell development                          | 1.30E-04 | 1.10E-02 |
| 61138 | morphogenesis of a branching epithelium                 | 1.50E-04 | 1.22E-02 |
| 48522 | positive regulation of cellular process                 | 1.53E-04 | 1.22E-02 |
| 9792  | embryonic development ending in birth or egg hatching   | 1.64E-04 | 1.27E-02 |
| 7420  | brain development                                       | 2.03E-04 | 1.53E-02 |
| 51128 | regulation of cellular component organization           | 2.25E-04 | 1.66E-02 |
| 2009  | morphogenesis of an epithelium                          | 3.42E-04 | 2.45E-02 |
| 43009 | chordate embryonic development                          | 3.51E-04 | 2.46E-02 |
| 48518 | positive regulation of biological process               | 3.75E-04 | 2.56E-02 |
| 7584  | response to nutrient                                    | 3.91E-04 | 2.61E-02 |
| 45661 | regulation of myoblast differentiation                  | 4.06E-04 | 2.65E-02 |
| 22612 | gland morphogenesis                                     | 4.57E-04 | 2.86E-02 |
| 7569  | cell aging                                              | 4.58E-04 | 2.86E-02 |
| 46578 | regulation of Ras protein signal transduction           | 4.90E-04 | 2.99E-02 |
| 10038 | response to metal ion                                   | 5.19E-04 | 3.11E-02 |
| 16202 | regulation of striated muscle tissue development        | 5.60E-04 | 3.28E-02 |
| 1701  | in utero embryonic development                          | 5.77E-04 | 3.31E-02 |
| 48634 | regulation of muscle organ development                  | 6.34E-04 | 3.56E-02 |
| 48812 | neuron projection morphogenesis                         | 7.09E-04 | 3.88E-02 |
| 45595 | regulation of cell differentiation                      | 7.25E-04 | 3.88E-02 |
| 51148 | negative regulation of muscle cell differentiation      | 7.40E-04 | 3.88E-02 |
| 31667 | response to nutrient levels                             | 7.51E-04 | 3.88E-02 |
| 33189 | response to vitamin A                                   | 7.58E-04 | 3.88E-02 |
| 51095 | regulation of helicase activity                         | 7.79E-04 | 3.92E-02 |
| 902   | cell morphogenesis                                      | 8.39E-04 | 4.09E-02 |
| 51097 | negative regulation of helicase activity                | 8.40E-04 | 4.09E-02 |
| 35023 | regulation of Rho protein signal transduction           | 9.42E-04 | 4.34E-02 |
| 30030 | cell projection organization                            | 9.46E-04 | 4.34E-02 |
| 1101  | response to acid                                        | 9.57E-04 | 4.34E-02 |
| 30199 | collagen fibril organization                            | 9.57E-04 | 4.34E-02 |
| 51056 | regulation of small GTPase mediated signal transduction | 9.70E-04 | 4.34E-02 |
| 51960 | regulation of nervous system development                | 9.83E-04 | 4.34E-02 |
| 35295 | tube development                                        | 1.11E-03 | 4.80E-02 |
| 7431  | salivary gland development                              | 1.14E-03 | 4.80E-02 |

|       |                                  |          |          |
|-------|----------------------------------|----------|----------|
| 2520  | immune system development        | 1.15E-03 | 4.80E-02 |
| 50767 | regulation of neurogenesis       | 1.17E-03 | 4.80E-02 |
| 43065 | positive regulation of apoptosis | 1.17E-03 | 4.80E-02 |
| 50794 | regulation of cellular process   | 1.22E-03 | 4.93E-02 |

FDR, false discovery rate.

| <b>Supplementary Table S9. Significantly enriched Kyoto Encyclopedia of Genes and Genome (KEGG) pathways within all non-synonymous mutated genes.</b> |                                                        |          |           |
|-------------------------------------------------------------------------------------------------------------------------------------------------------|--------------------------------------------------------|----------|-----------|
| KEGG_ID                                                                                                                                               | Pathway name                                           | <i>P</i> | FDR       |
| hsa04919                                                                                                                                              | Thyroid hormone signaling pathway                      | 0.00075  | 0.197814  |
| hsa04360                                                                                                                                              | Axon guidance                                          | 0.0036   | 0.197814  |
| hsa05206                                                                                                                                              | MicroRNAs in cancer                                    | 0.00441  | 0.197814  |
| hsa04320                                                                                                                                              | Dorso-ventral axis formation                           | 0.00967  | 0.235867  |
| hsa04970                                                                                                                                              | Salivary secretion                                     | 0.0103   | 0.235867  |
| hsa04662                                                                                                                                              | B cell receptor signaling pathway                      | 0.01038  | 0.235867  |
| hsa04520                                                                                                                                              | Adherens junction                                      | 0.01107  | 0.235867  |
| hsa04611                                                                                                                                              | Platelet activation                                    | 0.0116   | 0.235867  |
| hsa04713                                                                                                                                              | Circadian entrainment                                  | 0.01436  | 0.273738  |
| hsa04330                                                                                                                                              | Notch signaling pathway                                | 0.02209  | 0.313752  |
| hsa04720                                                                                                                                              | Long-term potentiation                                 | 0.02366  | 0.313752  |
| hsa05215                                                                                                                                              | Prostate cancer                                        | 0.02734  | 0.347446  |
| hsa03010                                                                                                                                              | Ribosome                                               | 0.0342   | 0.355325  |
| hsa05412                                                                                                                                              | Arrhythmogenic right ventricular cardiomyopathy (ARVC) | 0.03495  | 0.355325  |
| hsa04921                                                                                                                                              | Oxytocin signaling pathway                             | 0.03878  | 0.369622  |
| hsa04960                                                                                                                                              | Aldosterone-regulated sodium reabsorption              | 0.04071  | 0.376259  |
| hsa03430                                                                                                                                              | Mismatch repair                                        | 0.04286  | 0.384479  |
| hsa04730                                                                                                                                              | Long-term depression                                   | 0.04728  | 0.4120114 |
